# Supplementary material for: Oxoaporphine Metal Complexes (CoII, NiII, ZnII) with High Antitumor Activity by Inducing Mitochondria-Mediated Apoptosis and S-phase Arrest in HepG2
Source: PubMed Central journal article supplement (PMC5402304; doi:10.1038/srep46056), 2017-04-24
Supplement: srep46056-s1.pdf [file srep46056-s1.pdf]

---

**OxoaporphineMetal Complexes (Co<sup>II</sup>, Ni<sup>II</sup>, Zn<sup>II</sup>) with High  
Antitumor Activity by InducingMitochondria-Mediated Apoptosis  
and S-phase Arrest in HepG2**

*Jiao-Lan Qin<sup>†</sup>, Wen-Ying Shen<sup>†</sup>, Zhen-Feng Chen\*, Li-Fang Zhao, Qi-Pin Qin,  
Yan-Cheng Yu, Hong Liang\**

*State Key Laboratory for Chemistry and Molecular Engineering of Medicinal  
Resources, School of Chemistry and Pharmacy, Guangxi Normal University, 15 Yucai  
Road, Guilin 541004, P. R. China.*

**Table S1** Crystallographic data and refinements of complexes **1–3** and **OD**.

|                                          | <b>OD</b>                                       | <b>1</b>                                                                         | <b>2</b>                                                                         | <b>3</b>                                                                         |
|------------------------------------------|-------------------------------------------------|----------------------------------------------------------------------------------|----------------------------------------------------------------------------------|----------------------------------------------------------------------------------|
| Formula                                  | C <sub>21</sub> H <sub>19</sub> NO <sub>5</sub> | C <sub>42</sub> H <sub>42</sub> Cl <sub>2</sub> CoN <sub>2</sub> O <sub>21</sub> | C <sub>44</sub> H <sub>46</sub> C <sub>12</sub> NiN <sub>2</sub> O <sub>20</sub> | C <sub>42</sub> H <sub>46</sub> Cl <sub>2</sub> ZnN <sub>2</sub> O <sub>22</sub> |
| <i>M<sub>r</sub></i>                     | 365.38                                          | 1040.61                                                                          | 1052.44                                                                          | 1067.08                                                                          |
| Crystal system                           | <i>Monoclinic</i>                               | <i>Triclinic</i>                                                                 | <i>monoclinic</i>                                                                | <i>Triclinic</i>                                                                 |
| Space group                              | <i>P2(1)/c</i>                                  | <i>P-1</i>                                                                       | <i>P2(1)/n</i>                                                                   | <i>P-1</i>                                                                       |
| <i>a</i> /Å                              | 14.7970(13)                                     | 11.9385(3)                                                                       | 7.9782(7)                                                                        | 11.9525(7)                                                                       |
| <i>b</i> /Å                              | 8.9351(8)                                       | 12.6488(3)                                                                       | 15.9908(17)                                                                      | 12.6917(4)                                                                       |
| <i>c</i> /Å                              | 15.8677(16)                                     | 15.9365(4)                                                                       | 35.913(5)                                                                        | 16.0413(9)                                                                       |
| <i>α</i> /°                              | 90.00(3)                                        | 74.630(2)                                                                        | 90.00                                                                            | 74.647(4)                                                                        |
| <i>β</i> /°                              | 107.0190(10)                                    | 79.728(2)                                                                        | 89.742(10)                                                                       | 79.932(5)                                                                        |
| <i>γ</i> /°                              | 90.00(2)                                        | 87.418(2)                                                                        | 90.00                                                                            | 87.379(4)                                                                        |
| <i>V</i> /Å <sup>3</sup>                 | 2006.0(3)                                       | 2283.28 (10)                                                                     | 4581.6(9)                                                                        | 2310.5(2)                                                                        |
| <i>T</i> /K                              | 293(2)                                          | 293(2)                                                                           | 293(2)                                                                           | 293(2)                                                                           |
| <i>Z</i>                                 | 4                                               | 2                                                                                | 4                                                                                | 2                                                                                |
| <i>D<sub>c</sub></i> /g cm <sup>-3</sup> | 1.263                                           | 1.514                                                                            | 1.526                                                                            | 1.534                                                                            |
| <i>θ</i> /°                              | 2.65 to 25.02                                   | 2.82 to 26.37                                                                    | 2.83 to 28.63                                                                    | 2.93 to 26.37                                                                    |
| <i>F</i> (000)                           | 804                                             | 1074                                                                             | 2184                                                                             | 1104                                                                             |
| <i>μ</i> (Mo Kα)/mm <sup>-1</sup>        | 0.091                                           | 0.578                                                                            | 0.624                                                                            | 0.734                                                                            |
| Total no. reflns                         | 10136                                           | 9319                                                                             | 4140                                                                             | 9408                                                                             |
| No. indep. reflns                        | 3525                                            | 8004                                                                             | 2839                                                                             | 6074                                                                             |
| R1 [ <i>I</i> > 2σ( <i>I</i> )]          | 0.0766                                          | 0.0585                                                                           | 0.0758                                                                           | 0.0686                                                                           |
| <i>w</i> R2(all data)                    | 0.2175                                          | 0.1736                                                                           | 0.2037                                                                           | 0.1084                                                                           |
| Gof( <i>F</i> <sup>2</sup> )             | 1.084                                           | 1.085                                                                            | 1.078                                                                            | 1.034                                                                            |

**Table S2** Selected bond lengths[Å] and angles [°]of **OD** and **1–3**

|                  |          |                  |           |                  |            |
|------------------|----------|------------------|-----------|------------------|------------|
| <b>OD</b>        |          |                  |           |                  |            |
| N(1)–C(1)        | 1.342(4) | O(4)–C(14)       | 1.370(4)  | O(1)–C(2)–C(3)   | 121.9(3)   |
| N(1)–C(13)       | 1.345(5) | O(5)–C(15)       | 1.352(4)  | O(1)–C(2)–C(1)   | 120.5(3)   |
| O(1)–C(2)        | 1.240(3) | O(5)–C(19)       | 1.444(4)  | O(4)–C(14)–C(9)  | 120.2(3)   |
| O(2)–C(5)        | 1.355(4) | O(6)–C(22)       | 1.43(8)   | O(2)–C(5)–C(6)   | 116.9(3)   |
| O(2)–H(2)        | 0.8200   | C(1)–N(1)–C(13)  | 118.1(3)  | O(3)–C(6)–C(7)   | 124.8(3)   |
| O(3)–C(6)        | 1.363(4) | N(1)–C(1)–C(10)  | 123.6(3)  | N(1)–C(13)–C(12) | 123.7(4)   |
| O(3)–C(17)       | 1.429(4) | C(6)–O(3)–C(17)  | 117.3(3)  | N(1)–C(1)–C(2)   | 116.3(3)   |
| O(4)–C(18)       | 1.310(5) | C(18)–O(4)–C(14) | 127.4(4)  | O(2)–C(5)–C(4)   | 124.6(3)   |
| <b>Complex 1</b> |          |                  |           |                  |            |
| Co(1)–O(1)       | 2.138(2) | O(6)–Co(1)–O(1)  | 175.90(9) | C(6)–O(1)–Co(1)  | 114.09(18) |
| Co(1)–O(6)       | 2.091(2) | O(6)–Co(1)–O(11) | 87.73(11) | C(30)–O(6)–Co(1) | 114.33(18) |
| Co(1)–O(11)      | 2.110(3) | O(6)–Co(1)–N(2)  | 78.17(9)  | C(1)–N(1)–Co(1)  | 126.7(2)   |

|                  |          |                    |            |                   |            |
|------------------|----------|--------------------|------------|-------------------|------------|
| Co(1)–O(12)      | 2.052(3) | O(11)–Co(1)–O(1)   | 88.61(10)  | C(5)–N(1)–Co(1)   | 114.82(18) |
| Co(1)–N(1)       | 2.081(2) | O(12)–Co(1)–O(1)   | 92.27(12)  | N(2)–Co(1)–O(11)  | 89.98(11)  |
| Co(1)–N(2)       | 2.100(3) | O(12)–Co(1)–O(6)   | 91.36(12)  | C(22)–N(2)–Co(1)  | 113.06(19) |
| N(1)–C(1)        | 1.349(4) | O(12)–Co(1)–O(11)  | 178.80(13) | N(1)–C(1)–C(2)    | 121.9(3)   |
| N(1)–C(5)        | 1.341(4) | O(12)–Co(1)–N(1)   | 92.50(11)  | C(23)–N(2)–Co(1)  | 129.2(2)   |
| N(2)–C(22)       | 1.337(4) | O(12)–Co(1)–N(2)   | 90.61(11)  | N(1)–Co(1)–O(11)  | 86.89(10)  |
| N(2)–C(23)       | 1.338(4) | N(1)–Co(1)–O(1)    | 77.33(8)   | N(1)–Co(1)–N(2)   | 176.70(10) |
| O(6)–C(30)       | 1.248(3) | N(1)–Co(1)–O(6)    | 100.62(9)  | N(2)–Co(1)–O(1)   | 103.68(9)  |
| <b>Complex 2</b> |          |                    |            |                   |            |
| Ni(1)–O(1)       | 2.047(3) | O(1)–Ni(1)–O(1A)   | 180.00(11) | C(1)–N(1)–Ni(1)   | 129.8(4)   |
| Ni(1)–O(10)      | 2.059(4) | O(1)–Ni(1)–O(10)   | 89.50(18)  | C(14)–N(1)–Ni(1)  | 112.2(3)   |
| O(1)–C(15)       | 1.253(6) | O(1)–Ni(1)–O(10A)  | 90.50(18)  | C(15)–O(1)–Ni(1)  | 113.0(3)   |
| N(1)–C(1)        | 1.353(6) | O(10)–Ni(1)–O(10A) | 180.0(3)   | N(1)–C(1)–C(2)    | 122.3(5)   |
| N(1)–C(14)       | 1.341(6) | N(1)–Ni(1)–O(1A)   | 99.18(15)  | N(1)–Ni(1)–O(10A) | 89.51(17)  |
| C(1)–C(2)        | 1.362(7) | N(1)–Ni(1)–O(1)    | 80.82(15)  | N(1)–Ni(1)–O(10)  | 90.49(17)  |
| O(10)–C(23)      | 1.391(8) | N(1A)–Ni(1)–N(1A)  | 180.00(18) | C(23)–O(10)–Ni(1) | 127.2(5)   |
| <b>Complex 3</b> |          |                    |            |                   |            |
| Zn(1)–O(1)       | 2.168(3) | O(6)–Zn(1)–O(1)    | 175.06(13) | N(2)–Zn(1)–O(12)  | 88.58(14)  |
| Zn(1)–O6         | 2.116(3) | O(6)–Zn(1)–O(12)   | 87.89(14)  | C(1)–O(1)–Zn(1)   | 112.9(2)   |
| Zn(1)–O(11)      | 2.100(4) | O(11)–Zn(1)–O(1)   | 93.49(15)  | C(2)–O(1)–Zn(1)   | 114.9(2)   |
| Zn(1)–O(12)      | 2.160(3) | O(11)–Zn(1)–O(6)   | 91.19(16)  | C(3)–O(1)–Zn(1)   | 126.3(3)   |
| Zn(1)–N(1)       | 2.069(3) | O(12)–Zn(1)–O(1)   | 87.42(14)  | C(3)–N(1)–C(2)    | 118.8(3)   |
| Zn(1)–N(2)       | 2.080(3) | N(1)–Zn(1)–O(1)    | 78.00(11)  | C(39)–N(2)–Zn(1)  | 128.6(3)   |
| O(1)–C(1)        | 1.252(5) | N(1)–Zn(1)–O(6)    | 100.24(12) | C(40)–N(2)–Zn(1)  | 113.2(3)   |
| N(1)–C(2)        | 1.342(5) | N(1)–Zn(1)–O(11)   | 92.45(14)  | N(2)–Zn(1)–O(1)   | 102.66(12) |
| N(1)–C(3)        | 1.337(5) | N(1)–Zn(1)–O(12)   | 87.27(13)  | N(2)–Zn(1)–O(6)   | 78.76(12)  |
| N(2)–C(39)       | 1.352(5) | N(1)–Zn(1)–N(2)    | 175.77(14) | N(2)–Zn(1)–O(11)  | 91.69(15)  |

**Table S3.** The inhibitive ratios of OD,1–3 and corresponding metal salt for the selected cells and one normal liver cell line HL-7702 for 48 h.

|                                    | HepG2       | T-24       | BEL-7404   | MGC80-3    | SKOV-3/DDP | HL-7702     |
|------------------------------------|-------------|------------|------------|------------|------------|-------------|
| OD                                 | 33.35±0.32  | 46.91±0.17 | 36.28±0.18 | 42.28±0.24 | 45.57±1.94 | 46.55±0.67  |
| 1                                  | 88.34± 1.03 | 85.35±0.73 | 63.96±0.78 | 61.54±0.33 | 78.17±1.69 | 56.73±0.14  |
| 2                                  | 87.68 ±0.92 | 82.31±0.60 | 69.38±0.65 | 71.86±0.28 | 84.44±0.65 | 72.34±0.22  |
| 3                                  | 89.58±1.22  | 84.16±0.76 | 61.00±0.19 | 67.30±0.21 | 70.80±1.69 | 59.26±0.15  |
| Co(ClO <sub>4</sub> ) <sub>2</sub> | 32.87±0.13  | 36.23±0.09 | 23.29±0.09 | 24.74±0.03 | 21.74±0.03 | 45.91±0.187 |
| Ni(ClO <sub>4</sub> ) <sub>2</sub> | 32.57±0.29  | 37.86±0.19 | 32.31±0.07 | 16.35±0.09 | 11.25±0.12 | 50.14±0.06  |
| Zn(ClO <sub>4</sub> ) <sub>2</sub> | 30.94±0.39  | 28.19±0.13 | 24.07±0.15 | 17.63±0.07 | 12.33±0.05 | 43.18±0.19  |
| cisplatin <sup>b</sup>             | 71.93±0.83  | 75.26±1.00 | 76.07±2.68 | 65.58±0.09 | 15.13±0.07 | 68.96±1.34  |

inhibitive ratios are represent mean ± SD of at least five independent experiments(SD represents the standard deviation). The concentration of OD, 1–3 and corresponding salts are 20µmol/L<sup>b</sup> cisplatin was dissolved at a concentration of 1mM in 0.154 M NaCl.

**Table S4.** Primer sequences used in this work.

| target protein | Upstream primer sequences | Downstream primer sequences |
|----------------|---------------------------|-----------------------------|
| β-Actin        | AAAAGCCACCCCACTTCTCT      | GACCAAAGCCTTCATACATCTCA     |
| caspase-8      | CCAGTGCCAGACACACAGTC      | CCAGCAGGTTTCATGTCATC        |
| cytochrome c   | GTTTCGTTGTGCCAGCGACTA     | GCTTGCCCTCCCTTTTCAACG       |
| Apaf-1         | AGAGGTAGCGAGTGGACGTG      | CGCTGCGGCACCTCAAGTCT        |
| p21            | AGGGGACAGCAGAGGAAG        | CGTTTTTCGACCCTGAGAG         |
| CDK2           | AGTACTTCTATGCCTGATTACA    | TCCGTCCATCTTCATCCA          |
| PCNA           | TGAAGCACCAAACCAGGA        | GCATCTCCAATATGGCTG          |

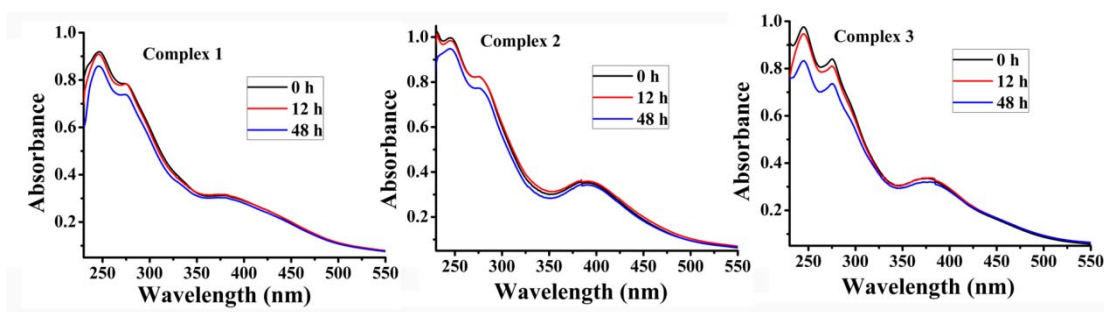

**Figure S1.** Solution stability of complexes 1–3 in tris buffer solution examined by UV-vis spectra.

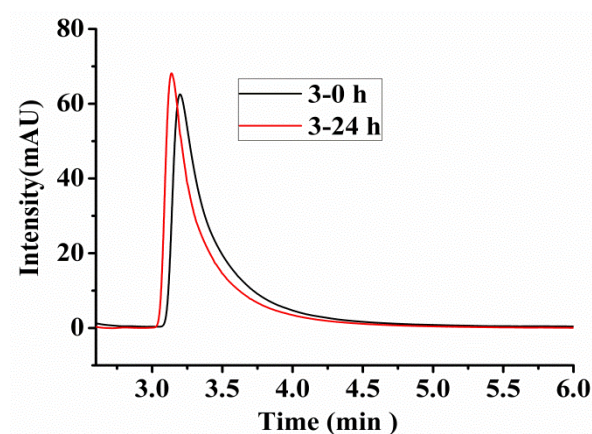

**Figure S2.** HPLC spectra of complex 3 in aqueous solution (1 mg/mL) with time 0 h and 24 h, respectively. Column: reversed-phase C18 column (YMC HPLC COLUMN, 250×4.6mm I. D.). Column temperature: 35°C. Mobile phase: Methanol/H<sub>2</sub>O (80:20). Flow rate: 1.0 ml/min. Injection volume: 10  $\mu$ L.

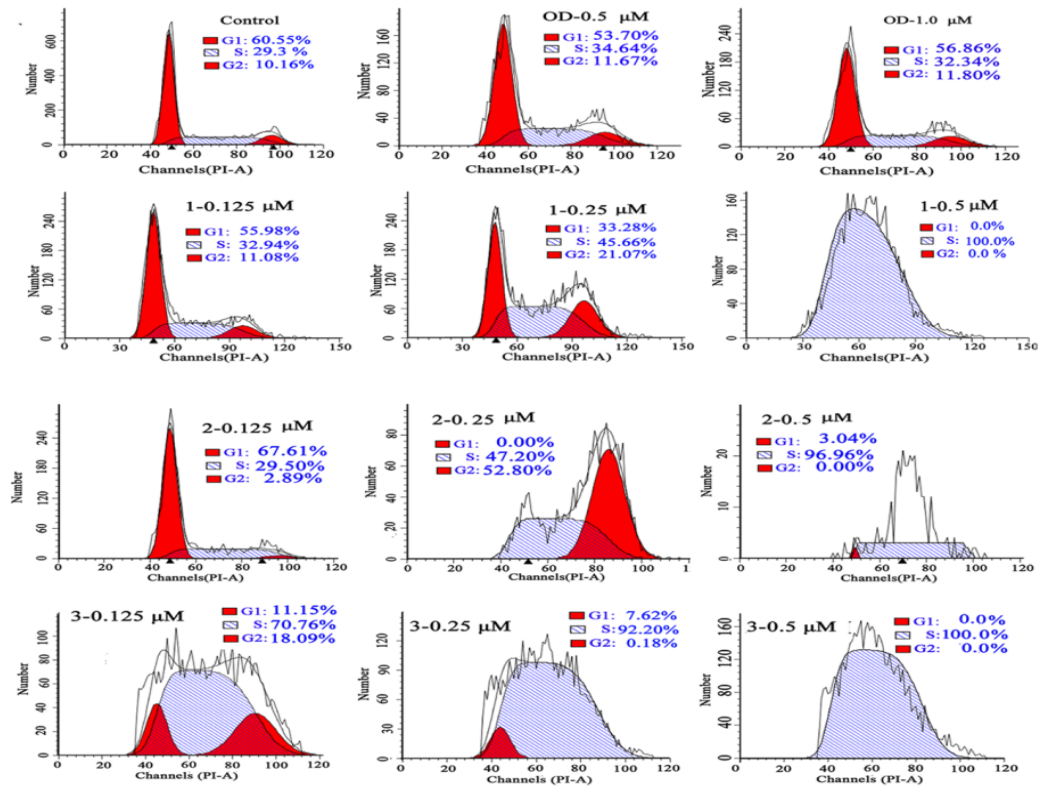

**Figure S3.** Cell cycle analysis of **1–3** (0.125, 0.25 and 0.5  $\mu\text{M}$ ) and **OD** (0.5 and 1.0  $\mu\text{M}$ ) for 24 h in HepG2 cells, graph bar show the distributions of cells in the different phases of cell cycle.

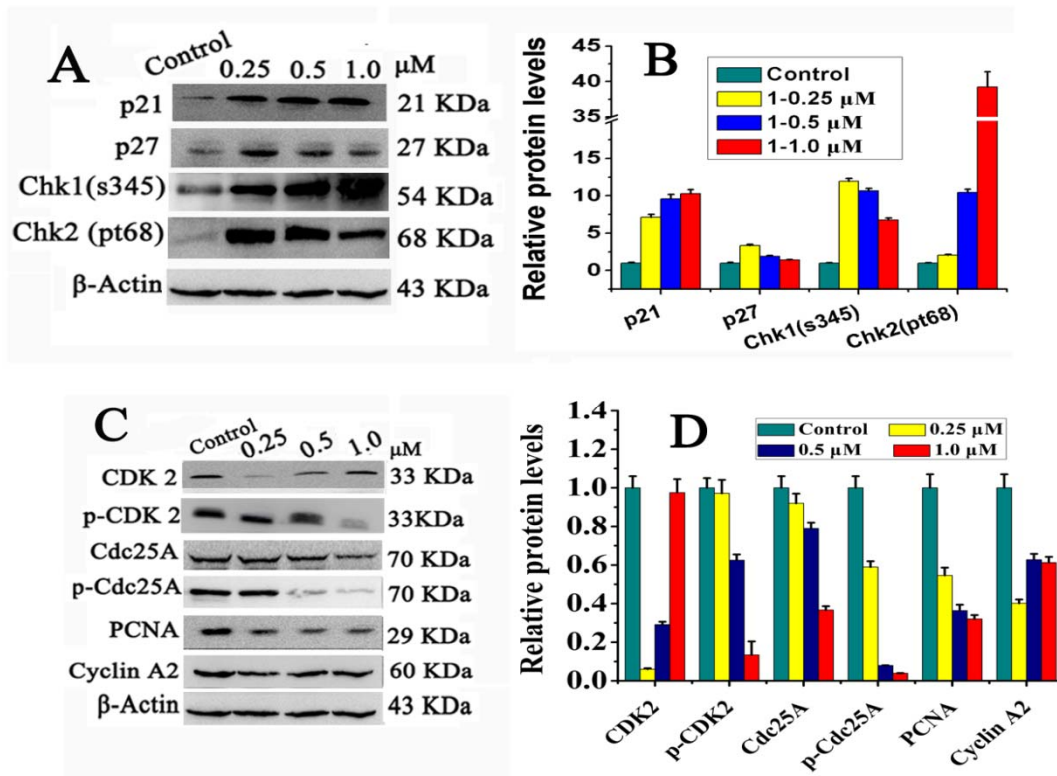

**Figure S4.** (A,C) Effects of complex 1 treatment in HepG2 cells on cell cycle regulatory proteins at 0.25 μM, 0.5 μM and 1.0 μM for 24 h, respectively. (B,D) The relative protein expression of each band = (density of each band/density of actin band). Mean ± SD was from three independent measurements.

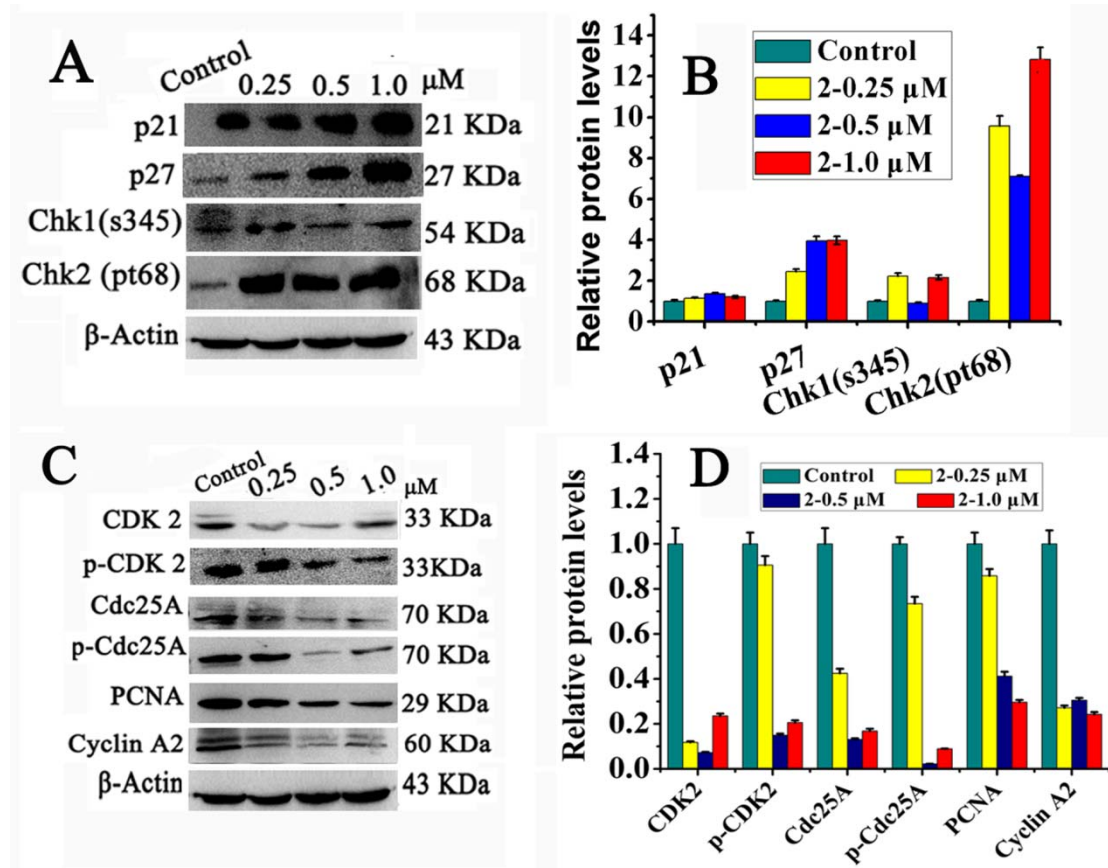

**Figure S5.** (a) Effects of complex 2 treatment in HepG2 cells on cell cycle regulatory proteins at 0.25 μM, 0.5 μM and 1.0 μM for 24 h, respectively. (b) The relative protein expression of each band = (density of each band/density of actin band). Mean ± SD was from three independent measurements.



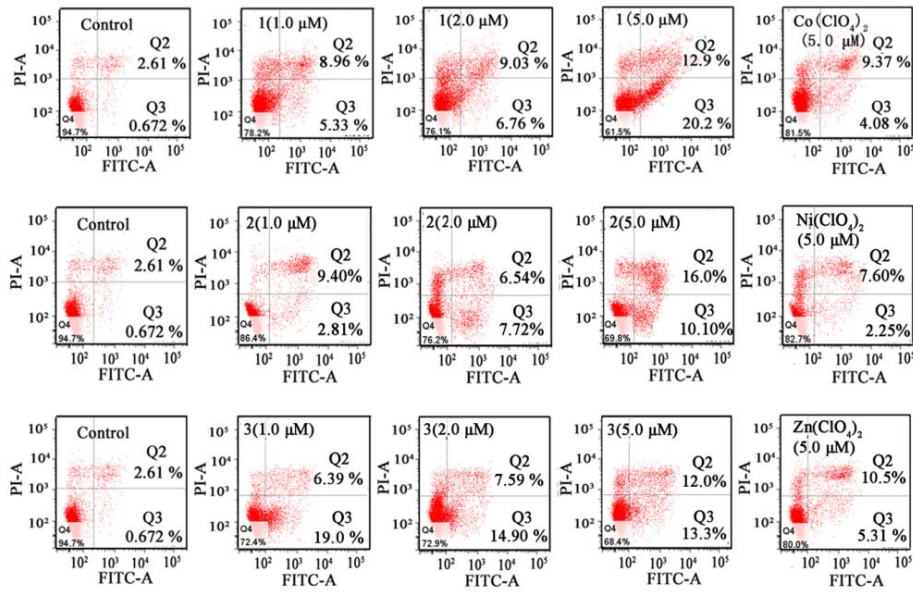

**Figure S6.** Effect of cell apoptosis of HepG2 treated with 1–3, OD and corresponding metal salts for 24 h compared with the control cells.

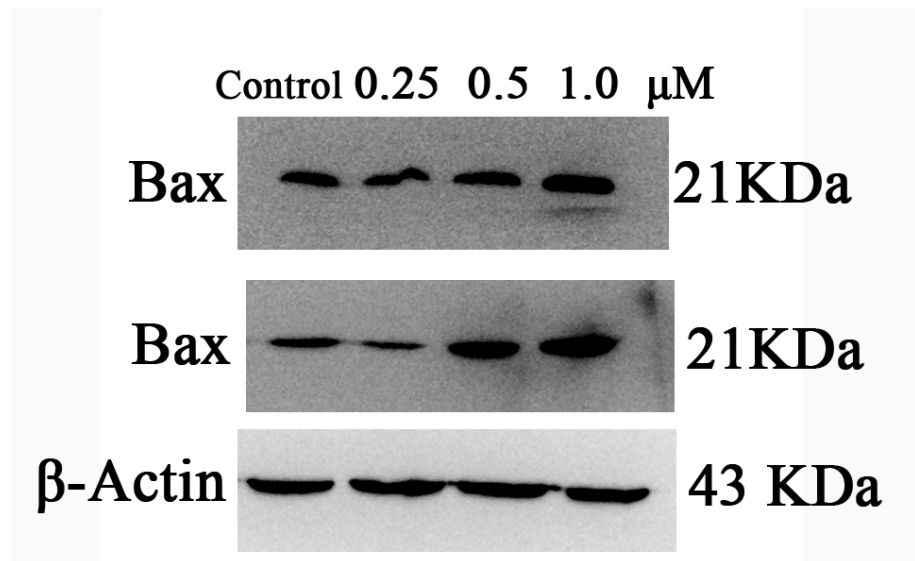

**Figure S7** Multiple Western blot analysis of Bax protein after treatment of HepG2 cells with 3 at 0.25, 0.5, 1.0 μM for 24 h, respectively.

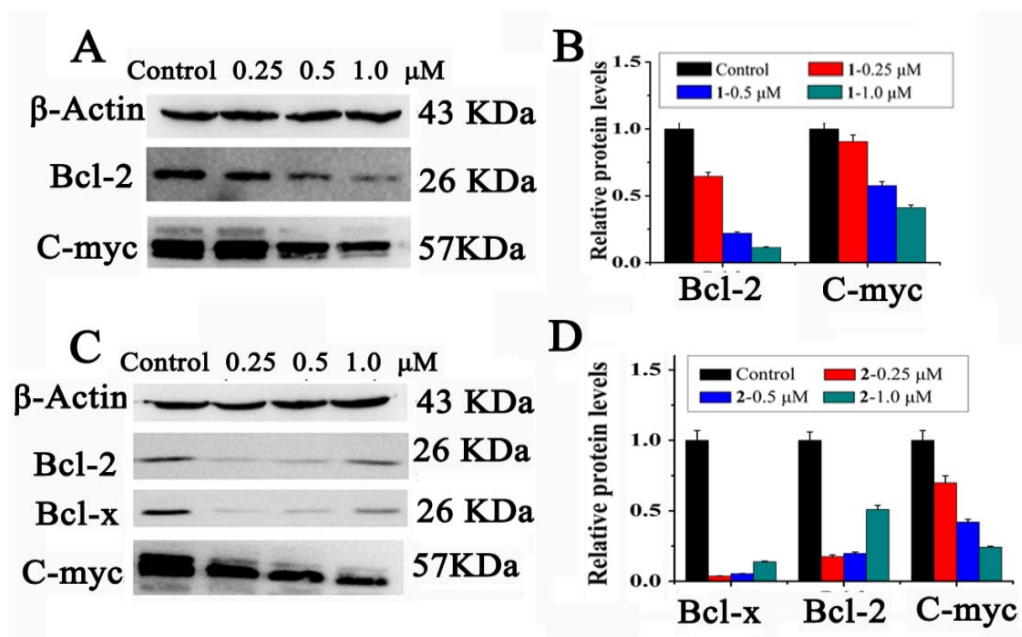

**Figure S8** (a) Western blot analysis of Bcl-2, and C-myc after treatment of HepG2 cells with complex 1 at 0.25, 0.5, 1.0  $\mu\text{M}$  for 24 h, respectively. (b) Densitometric analysis of Bcl-2 and C-myc band from part A. (c) Western blot analysis of Bcl-2, Bcl-x, and C-myc after treatment of HepG2 cells with complex 2 at 0.25, 0.5, 1.0  $\mu\text{M}$  for 24 h, respectively. (d) Densitometric analysis of Bcl-2, Bcl-x and C-myc band from part C. The relative expression of each band = (density of each band/ density of actin band). Mean and SD values were from three independent measurements.

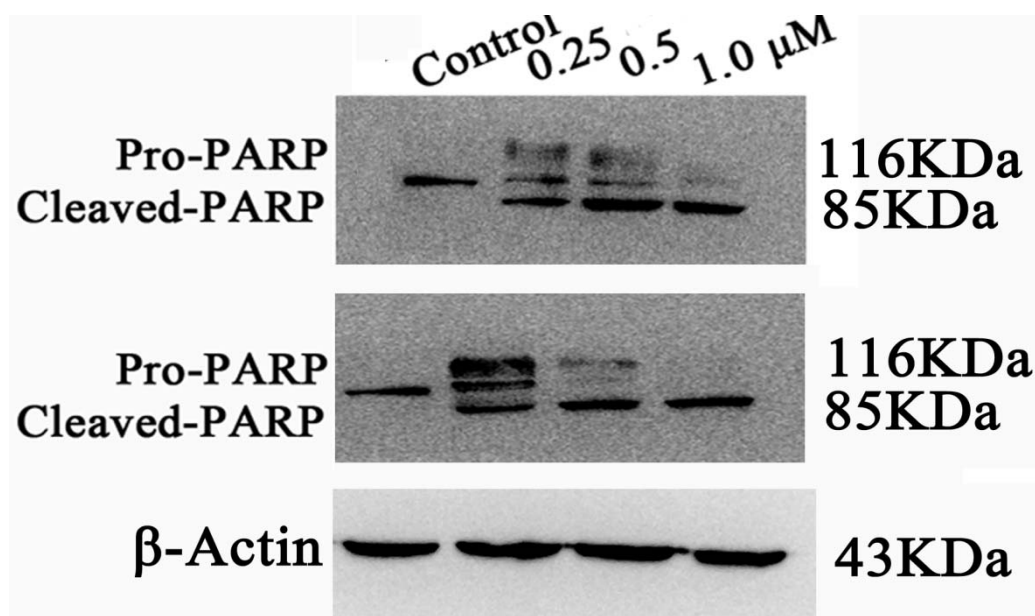

**Figure S9.** Multiple Western blot analysis of Pro-PARP and Cleaved-PARP proteins after treatment of HepG2 cells with 3 at 0.25, 0.5, 1.0  $\mu\text{M}$  for 24 h, respectively.

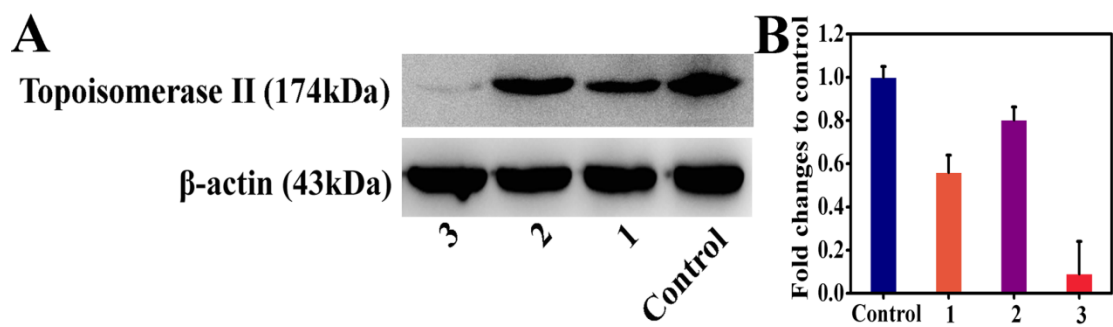

**Figure S10.** The protein levels of Topoisomerase II in HepG2 cells after treatment with complexes 1–3 (0.5  $\mu$ M), respectively. (A) Topoisomerase II protein regulators protein levels in HepG2 cells were analyzed by western blot. (B) The whole-cell extracts were prepared and analyzed by Western blot analysis using antibodies against cell cycle protein regulators proteins. The same blots were stripped and reprobbed with  $\beta$ -actin antibody to show equal protein loading. Western blotting bands from three independent measurements were quantified with Image J. in (B).

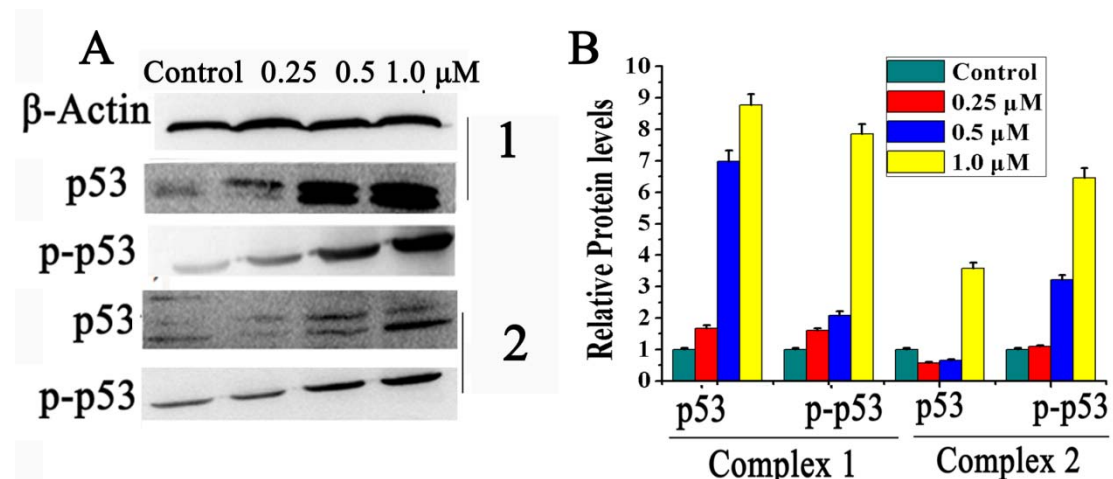

**Figure S11.**(a) Western blot analysis of p53 and p-p53 proteins in HepG2 cells with complex 1 and 2 at 0.25,0.5 and 1.0  $\mu$ M for 24 h. (b) The relative expression of proteins from A, each band = (density of each band/density of  $\beta$ -actin band). Mean  $\pm$  SD was from three independent measurements.

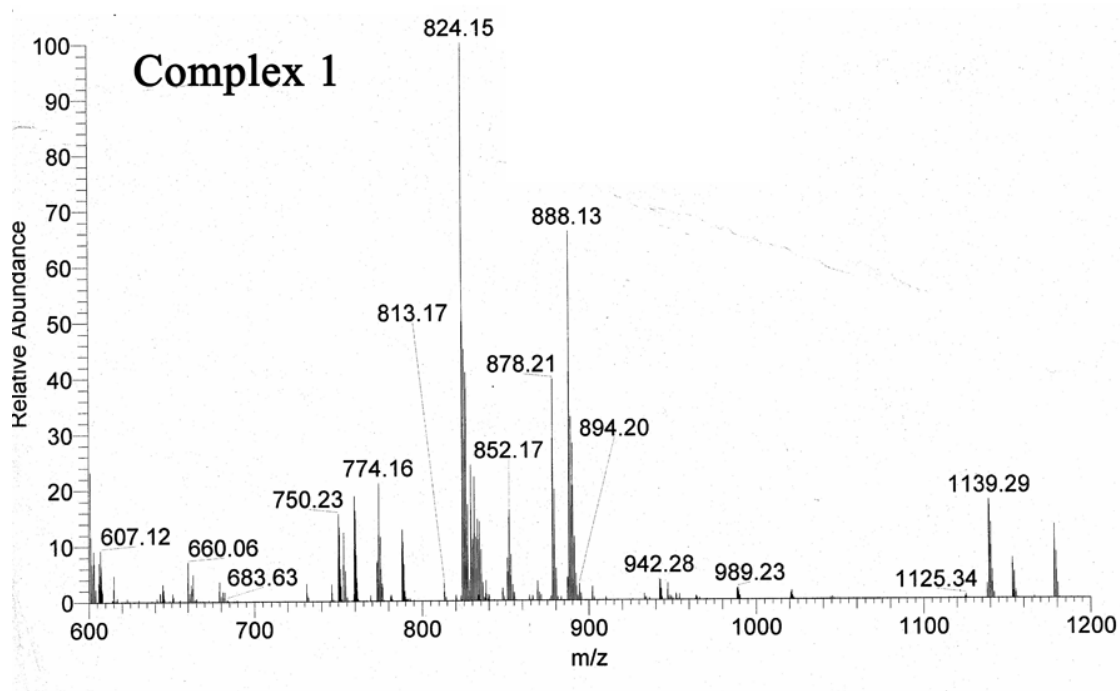

**Figure S12** ESI-MS spectrum of complex **1** in MeOH / H<sub>2</sub>O (1:500)

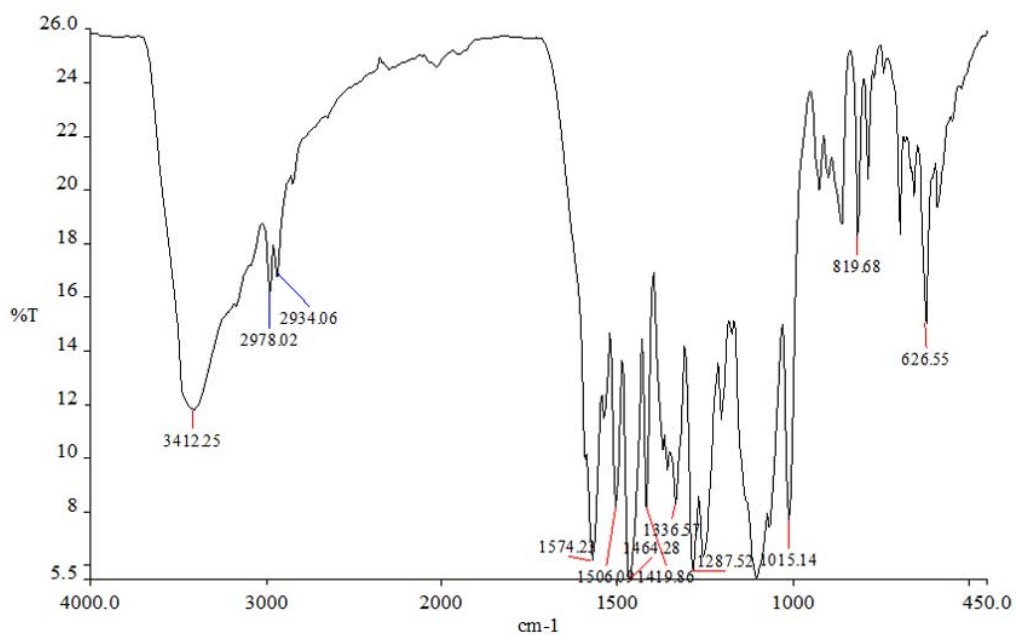

**Figure S13.** IR spectrum of complex **1**.

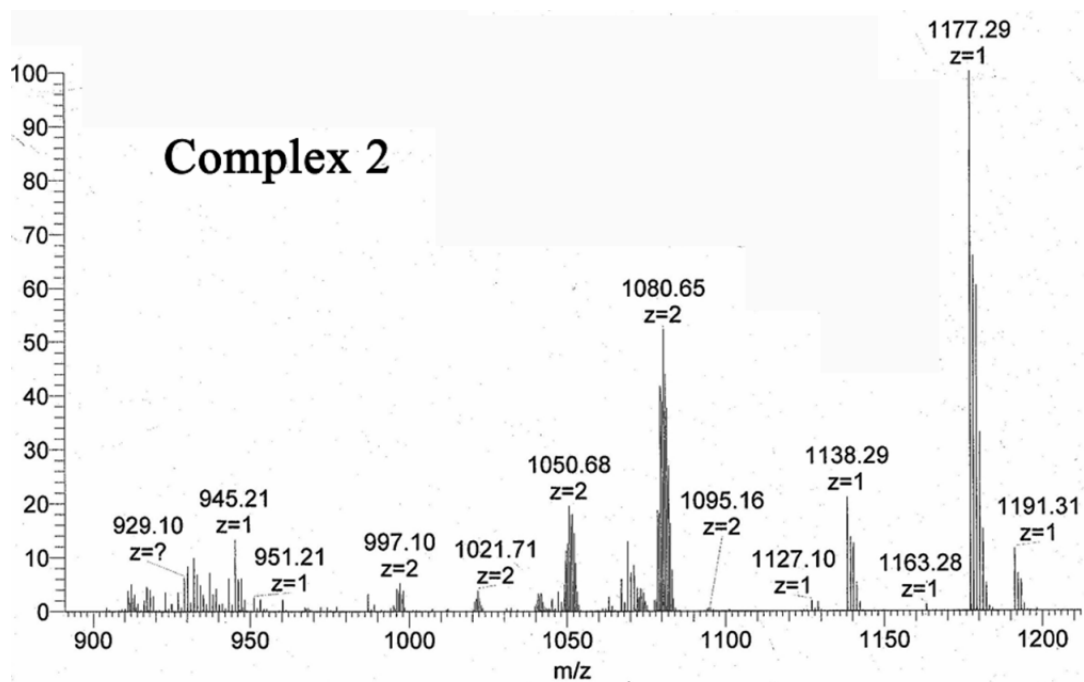

**Figure S14.** ESI-MS spectrum of complex **2** in MeOH / H<sub>2</sub>O (1:500)

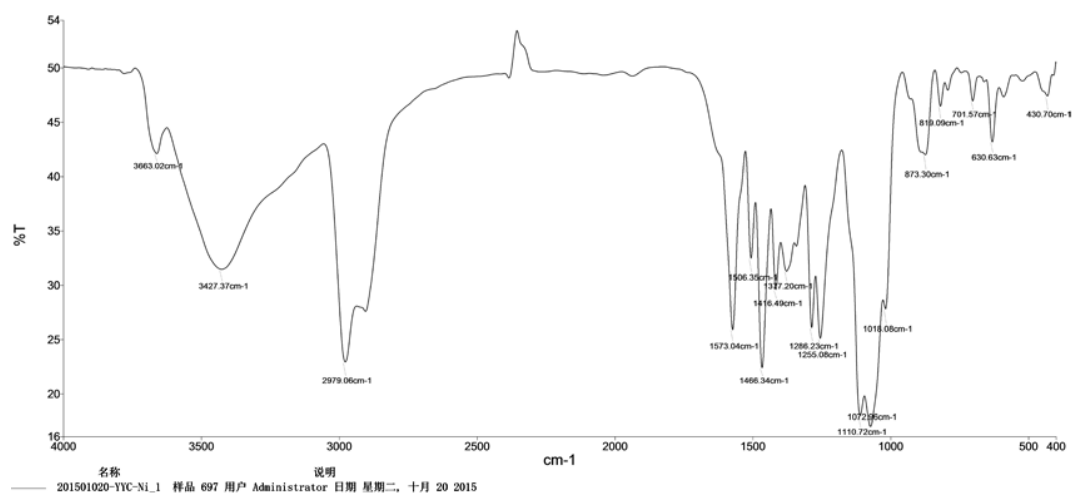

**Figure S15.** IR spectrum of complex **2**.

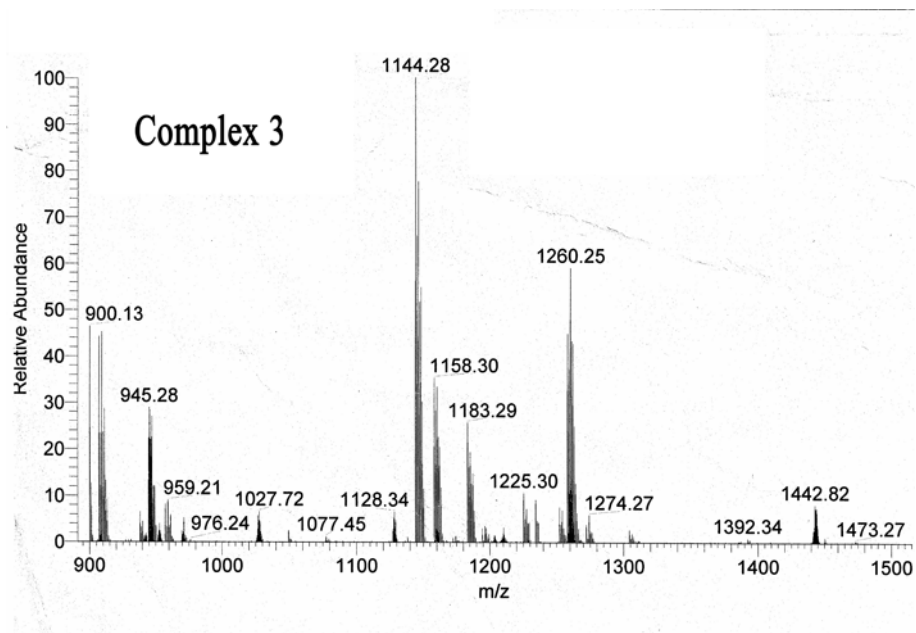

**Figure S16.** ESI-MS spectrum of complex **3** in MeOH / H<sub>2</sub>O (1:500)

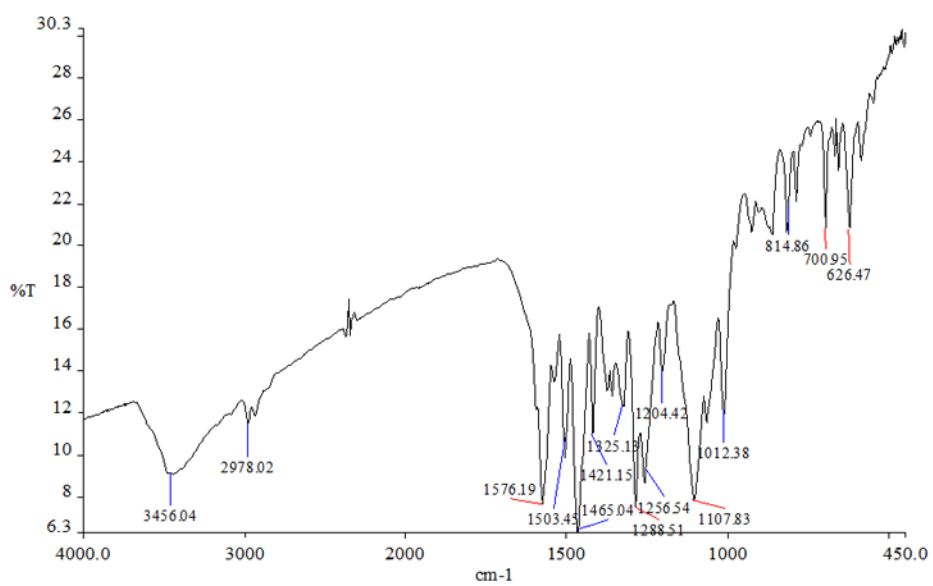

**Figure S17.** IR spectrum of complex **3**.
